# Supplementary material for: Inference Using Sample Means of Parametric Nonlinear Data Transformations
Source: Wiley journal article supplement (doi:10.1111/1475-6773.12494), 2016-04-18
Supplement: hesr12494-sup-0001-Appendix.pdf [file hesr12494-sup-0001-Appendix.pdf]

EZproxy Authentication


Skip to main content


LIBRARIES
INDIANAPOLIS


# EZProxy Authentication

IU Indianapolis ID

Select if you have an IU Indianapolis-affiliated Network ID. Your browser will be redirected to the IU Login login page (unless you are already logged into IU Login).

Library User ID

Select if you have been given a special Library-only username and password. NOTE: This account is valid only for access to IU Indianapolis Libraries electronic resources.

No User ID

Select to learn more about obtaining computer accounts at Indiana University. Your browser will be redirected to the IU Knowledge Base regarding computing accounts at IU.

### IU Indianapolis Libraries

University Library  
Ruth Lilly Medical Library  
Ruth Lilly Law Library  
IU School of Dentistry Library

### Get Help

About EZProxy  
EZProxy Bookmarklets  
Contact Your Campus Library

### IU Indianapolis

317-274-5555  
420 University Blvd.  
Indianapolis, IN 46202


- Accessibility
- Privacy Notice
- Copyright © 2024 The Trustees of Indiana University
